# Supplementary material
Source: publisher figshare collection journal article supplement (https://sage.figshare.com/ndownloader/files/14893589)
Supplement: Supplementary file 1 [file 14893589]

# Stimulus Materials for

## **Shaping the Body Politic:**

### **Mass Media Fat-Shaming Affects Implicit Anti-Fat Attitudes**

All materials for this research were developed and administered by the researchers associated with “Blinded”. As we do not hold copyright to the materials, and the materials are publically available at the website Open Science Framework, we include here a link to the original authors’ Experimental Materials page: [“Blinded”](#)
